# Supplementary material
Source: publisher site journal article supplement (https://www.dovepress.com/article/404171)
Supplement: Supplementary file 1 [file get_supplementary_file.php]

**Demographic of Participant**

Name :

Address :

Population Type : History TB patient Non-TB patient

Sex : Male Female

Age in years : 17-25 56-65

26-35 >65

36-45

Educational status : Basic School Masters

High school Doctorate

Bachelor

Marital status : Married Never Married

Occupation : Entrepreneur Civil Servant Non Lecturer

Student No Job/Dependent

Farmer Private Employees

Lecturer Others

Salary : < Rp 2.500.000 > Rp 3.000.000

Rp 2.500.000 - Rp 3.000.000

Residence : Village City

**Knowledge**

K1 TB is caused by a viral infection

True False

K2 TB is a hereditary disease

True False

K3 Sputum tests is used to diagnose tuberculosis (TB)

True False

K4 TB could be transmitted through breast milk

True False

K5 Cough from a TB patient causes airborne transmission

True False

K6 TB is curable

True False

K7 The use of herbal medicines with TB drugs improves outcomes

True False

K8 TB treatment is carried out for 1-2 weeks

True False

K9 Discontinuation of TB medicines may increase the risk of resistance and severity

True False

K10 TB treatment can be done with adequate rest without taking medication

True False

**Attitude**

A1 TB is a serious and deadly disease

Strongly disagree Disagree Not Sure Agree Strongly agree

A2 TB is a mutual problem between communities and the government

Strongly disagree Disagree Not Sure Agree Strongly agree

A3 TB education is needed in the community.

Strongly disagree Disagree Not Sure Agree Strongly agree

A4 The community should recognize the correct and appropriate TB information

Strongly disagree Disagree Not Sure Agree Strongly agree

A5 TB treatment can be discontinued if the patient feels better

Strongly disagree Disagree Not Sure Agree Strongly agree

A6 Avoiding TB sufferers is the best attitude to prevent transmission

Strongly disagree Disagree Not Sure Agree Strongly agree

**Perception**

P1 You feel uncomfortable around people with TB

Strongly disagree Disagree Not Sure Agree Strongly agree

P2 You think TB sufferers are disgusting

Strongly disagree Disagree Not Sure Agree Strongly agree

P3 You think the family of TB sufferers should not participate in any function

Strongly disagree Disagree Not Sure Agree Strongly agree

P4 You think TB sufferers are scary

Strongly disagree Disagree Not Sure Agree Strongly agree

P5 You will keep your distance if you meet with TB sufferers

Strongly disagree Disagree Not Sure Agree Strongly agree

P6 You feel afraid of TB sufferers

Strongly disagree Disagree Not Sure Agree Strongly agree

P7 You try to have no contact with TB sufferers

Strongly disagree Disagree Not Sure Agree Strongly agree

P8 You don't want to communicate with TB sufferers

Strongly disagree Disagree Not Sure Agree Strongly agree

P9 You prefer to exclude TB sufferers from your community

Strongly disagree Disagree Not Sure Agree Strongly agree
